# Supplementary material
Source: PubMed Central journal article supplement (PMC2412941)

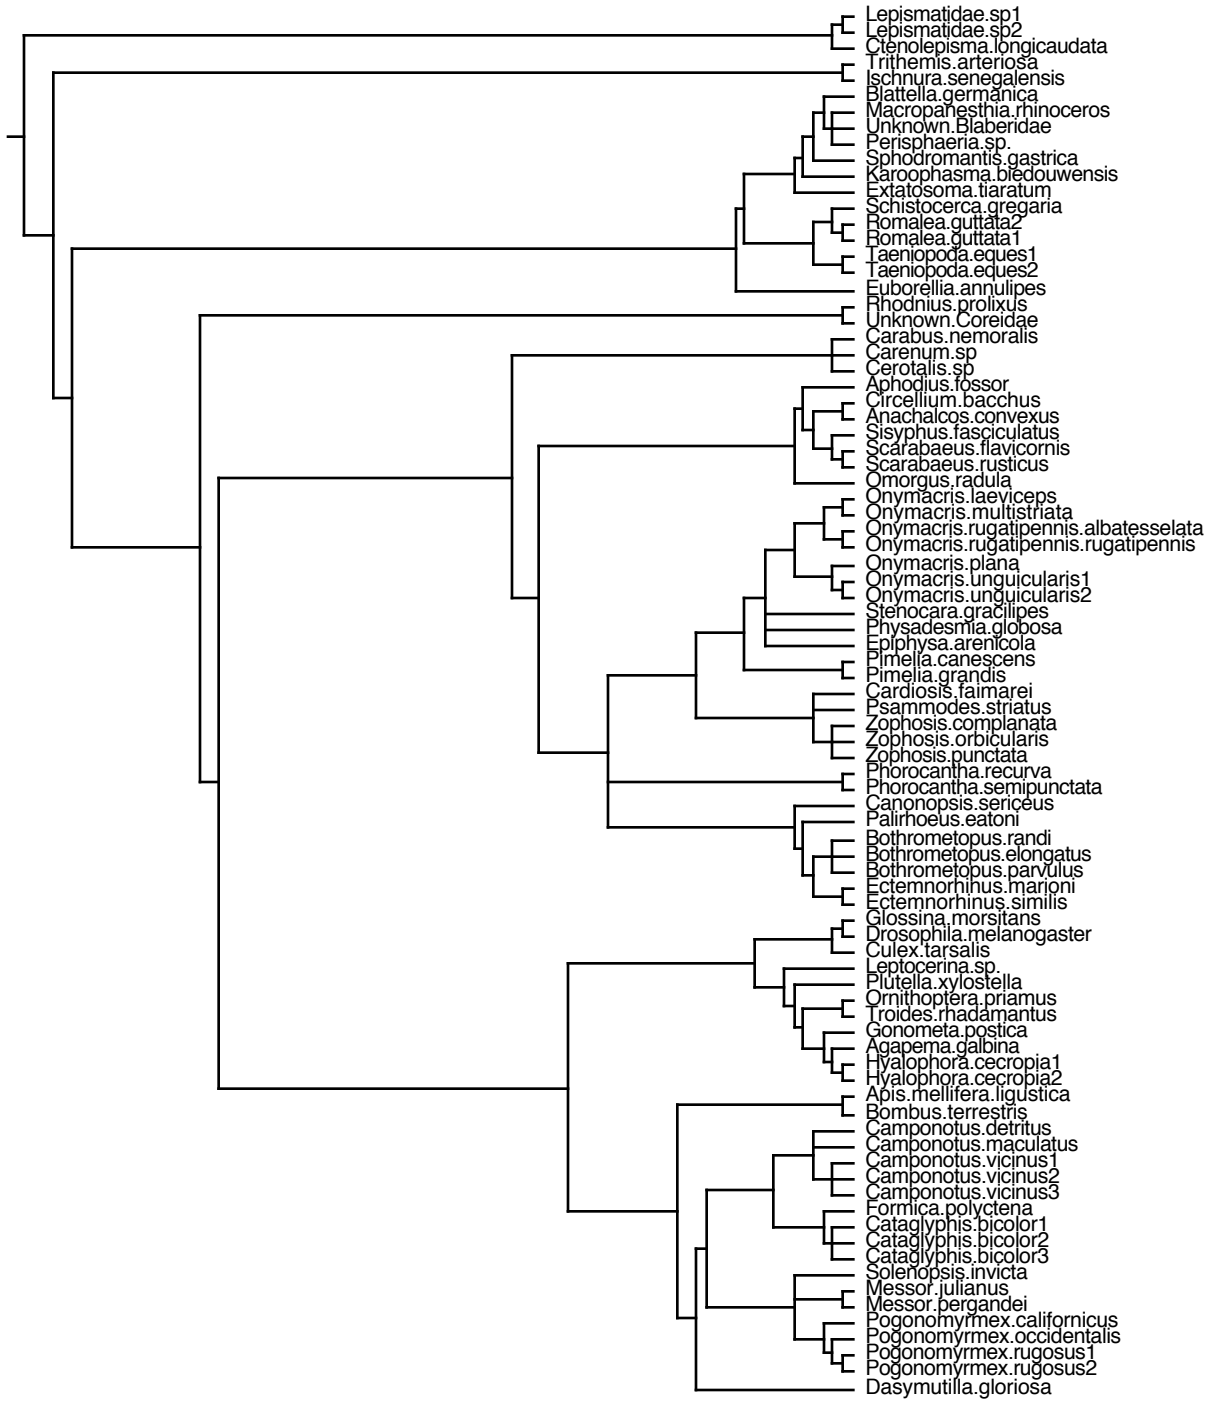

Supplement: rsbl20070522s28.pdf [file rsbl20070522s28.pdf]
